# Supplementary material for: The arabidopsis cyclic nucleotide interactome
Source: PubMed Central journal article supplement (PMC4865018; doi:10.1186/s12964-016-0133-2), 2016-05-11
Supplement: 12964_2016_133_MOESM2_ESM.pdf [file 12964_2016_133_MOESM2_ESM.pdf]

|                                                        |                                     |     |   |   |   |   |   |   |   |             |     |  |  |   |   |  |   |
|--------------------------------------------------------|-------------------------------------|-----|---|---|---|---|---|---|---|-------------|-----|--|--|---|---|--|---|
| Ribosomal protein S26e family protein                  | AT2G40510<br>AT2G40590<br>AT3G56340 |     |   |   |   |   |   |   |   | 1,2,3,4,6,B | 1   |  |  |   |   |  |   |
| Auxin transport protein (BIG)                          | AT3G02260                           |     |   |   |   |   |   |   |   |             |     |  |  |   |   |  | B |
| Ribosomal protein S13A (ATRPS13A)                      | AT4G00100                           | 3,B |   |   |   |   |   |   |   | 1,2,3,4     | 1   |  |  |   |   |  |   |
| Ribosomal protein S5 family protein                    | AT2G41840                           |     |   |   |   |   |   |   |   | 1,2         | 1   |  |  |   |   |  |   |
| CLPC homologue 1 (CLPC1)                               | AT5G50920                           | B   | B | B | B | B | B | B |   |             |     |  |  |   |   |  |   |
| Metallopeptidase M24 family protein (ATEBP1)           | AT3G51800                           |     |   |   |   |   |   |   |   | 1,2,3,4,6   | 1   |  |  |   |   |  |   |
| Ribosomal protein L14p/L23e family protein             | AT1G04480<br>AT2G33370<br>AT3G04400 |     |   |   |   |   |   |   |   | 1,2,B       | 1,2 |  |  |   |   |  |   |
| Ribosomal protein L18ae/LX family protein              | AT2G34480                           |     |   |   |   |   |   |   |   | 1           | 4   |  |  |   | B |  |   |
| Ribosomal protein L23/L15e family protein              | AT4G16720<br>AT4G17390              |     |   |   |   |   |   |   |   | 1,2,4,5,6   | 1,4 |  |  |   |   |  |   |
| Translation protein SH3-like family protein            | AT3G49910                           | 3   |   |   |   |   |   |   |   | 1,4,B       | 1   |  |  |   |   |  |   |
| Ribosomal protein L32e                                 | AT4G18100                           |     |   |   |   |   |   |   |   | 1,2,B       | 1   |  |  |   |   |  |   |
| Glucoside glucohydrolase 2 (BGLU37)                    | AT5G25980                           |     | 1 | 1 |   |   |   |   |   |             |     |  |  |   |   |  |   |
| Ribosomal protein L24e family protein (RPL24B)         | AT3G53020                           |     |   |   |   |   |   |   |   | 1           | 1   |  |  |   |   |  |   |
| Zinc-binding ribosomal protein family protein          | AT3G60245                           |     |   |   |   |   |   |   |   | 1           | 1   |  |  |   |   |  |   |
| Ribosomal protein L6 family protein                    | AT1G18540                           |     |   |   |   |   |   |   |   | 1,2,3,6     | 1   |  |  |   |   |  |   |
| Ribosomal protein L22p/L17e family protein             | AT1G67430                           |     |   |   |   |   |   |   |   | 1,3,B       | 1   |  |  |   |   |  |   |
| Ribosomal protein L36e family protein                  | AT3G53740                           |     |   |   |   |   |   |   |   | 1           |     |  |  | 2 |   |  |   |
| Subunit of exocyst complex 8 (ATSEC8)                  | AT3G10380                           |     |   |   |   |   |   |   |   |             |     |  |  |   |   |  | B |
| Aldolase-type TIM barrel family protein                | AT3G14420                           |     | B |   | B |   |   | B | B |             |     |  |  |   |   |  |   |
| Ribosomal protein L7Ae/L30e/S12e/Gadd45 family protein | AT3G18740                           |     |   |   |   |   |   |   |   | 6,B         |     |  |  |   |   |  |   |
| Tubulin beta-7 chain (TUB7)                            | AT2G29550                           |     |   |   |   |   |   |   |   | B           |     |  |  |   |   |  |   |
| Ribosomal protein L12-A (RPL12-A)                      | AT3G27830<br>AT3G27850              | 3,B | 1 |   | 3 |   |   |   |   |             |     |  |  |   |   |  |   |
| Ribosomal protein L13 family protein                   | AT3G24830                           |     |   |   |   |   |   |   |   | 1           |     |  |  |   |   |  |   |
| acetyl-CoA carboxylase 1 (ACC1)                        | AT1G36160                           |     |   |   |   |   |   |   |   |             |     |  |  | B |   |  | B |
| Ribosomal L29 family protein                           | AT3G09500                           |     |   |   |   |   |   |   |   | 1,B         |     |  |  |   |   |  |   |
| Ribosomal protein L7Ae/L30e/S12e/Gadd45 family protein | AT1G15930                           |     |   |   |   |   |   |   |   | 1           | 1   |  |  |   |   |  |   |

|                                                                      |                                     |           |  |     |  |     |   |  |  |         |     |   |  |   |  |   |  |   |
|----------------------------------------------------------------------|-------------------------------------|-----------|--|-----|--|-----|---|--|--|---------|-----|---|--|---|--|---|--|---|
| Ribosomal protein S6 (RPS6A)                                         | AT4G31700                           |           |  |     |  |     |   |  |  | 1       |     |   |  |   |  |   |  |   |
| 60S acidic ribosomal protein family                                  | AT2G27710                           |           |  |     |  |     |   |  |  | 1,2,3,6 | 1,2 |   |  |   |  |   |  |   |
| Catalase 2 (CAT2)                                                    | AT4G35090                           |           |  |     |  | 2,B |   |  |  |         |     |   |  |   |  |   |  |   |
| Glutamine synthase clone F11 (ATGSR2)                                | AT1G66200                           |           |  |     |  |     |   |  |  | 1       |     |   |  |   |  |   |  |   |
| Chloroplast stem-loop binding protein of 41 kDa (CSP41A)             | AT3G63140                           |           |  | 1,B |  |     |   |  |  |         |     |   |  |   |  |   |  |   |
| Ribosomal protein L19e family protein (emb2386)                      | AT1G02780                           |           |  |     |  |     |   |  |  | 1,2     | 1   |   |  |   |  |   |  |   |
| Ribosomal protein L30/L7 family protein                              | AT2G44120                           |           |  |     |  |     |   |  |  | 1,B     |     |   |  |   |  |   |  |   |
| Secretion-associated RAS 1B (SAR1B)                                  | AT1G56330<br>AT3G62560<br>AT4G02080 |           |  |     |  |     |   |  |  | B       |     |   |  |   |  | B |  | B |
| Ribosomal protein L16p/L10e family protein (RPL10A)                  | AT1G14320                           |           |  |     |  |     |   |  |  |         | 1   |   |  |   |  |   |  |   |
| Protochlorophyllide oxidoreductase B (PORB)                          | AT4G27440                           |           |  | B   |  | B   | B |  |  |         |     |   |  |   |  |   |  |   |
| Ribosomal protein S24e family protein                                | AT3G04920                           |           |  |     |  |     |   |  |  | 1       |     |   |  |   |  |   |  |   |
| Ribosomal protein L35Ae family protein                               | AT1G41880<br>AT3G55750              |           |  |     |  |     |   |  |  | 6       |     |   |  |   |  |   |  |   |
| Zinc-binding ribosomal protein family protein                        | AT2G45710<br>AT3G61110              |           |  |     |  |     |   |  |  | B       | 1   |   |  |   |  |   |  |   |
| Alanine:glyoxylate aminotransferase (SGAT)                           | AT2G13360                           |           |  |     |  | B   |   |  |  |         |     |   |  |   |  |   |  |   |
| Ribosomal protein S25 family protein                                 | AT4G39200                           |           |  |     |  |     |   |  |  | 1       |     |   |  |   |  |   |  |   |
| Ribosomal L28e protein family                                        | AT2G19730                           |           |  |     |  |     |   |  |  | 1       |     |   |  |   |  |   |  |   |
| Ribosomal protein L3 family protein                                  | AT2G43030                           | 4,B       |  |     |  |     |   |  |  |         |     |   |  |   |  |   |  |   |
| Ribosomal protein S5/Elongation factor G/III/V family protein (LOS1) | AT1G56070                           |           |  |     |  |     |   |  |  | B       |     |   |  |   |  |   |  |   |
| Chloroplastic acetylcoenzyme A carboxylase 1 (CAC1A)                 | AT5G16390                           |           |  | B   |  |     |   |  |  |         |     |   |  | B |  |   |  | B |
| 60S acidic ribosomal protein family                                  | AT5G57290                           |           |  |     |  |     |   |  |  | 1       |     |   |  |   |  |   |  |   |
| Serine hydroxymethyltransferase 4 (SHM4)                             | AT4G13930                           |           |  |     |  | B   |   |  |  |         |     |   |  |   |  |   |  |   |
| ATP synthase delta-subunit gene (ATPD)                               | AT4G09650                           |           |  | B   |  | B   |   |  |  | B       | B   |   |  |   |  |   |  |   |
| Ribosomal protein S28 (RPS28)                                        | AT5G64140                           |           |  |     |  |     |   |  |  |         |     | 1 |  |   |  |   |  |   |
| Ribosomal protein L15 (RPL15)                                        | AT3G25920                           | 3,4<br>,B |  |     |  |     |   |  |  |         |     |   |  |   |  |   |  |   |
| Ribosomal protein L4/L1 family                                       | AT5G02870                           |           |  |     |  |     |   |  |  | 1       |     |   |  |   |  |   |  |   |





|                                                 |           |   |  |  |  |  |  |  |  |  |  |  |  |  |   |  |  |  |
|-------------------------------------------------|-----------|---|--|--|--|--|--|--|--|--|--|--|--|--|---|--|--|--|
| SHK1 binding protein 1 (SKB1)                   | AT4G31120 |   |  |  |  |  |  |  |  |  |  |  |  |  | 2 |  |  |  |
| Glycosyl hydrolase superfamily protein (BGLU22) | AT1G66280 |   |  |  |  |  |  |  |  |  |  |  |  |  | 2 |  |  |  |
| Ribosomal protein S13/S18 family                | AT5G14320 | B |  |  |  |  |  |  |  |  |  |  |  |  |   |  |  |  |
| Ribosomal protein S18 (RPS18)                   | ATCG00650 | B |  |  |  |  |  |  |  |  |  |  |  |  |   |  |  |  |

The fraction in which the protein was identified is indicated with numbers 1-6 being the elution fractions (1 denotes the first and least stringent elution and 6 the final and most stringent elution) while B indicates that the protein was retained on the bead. For the cAMP baits the elutions were 1) 100 mM GDP; 2) 100 mM AMP; 3) 10 mM cGMP; 4) 100 mM cGMP; 5) 10 mM cAMP and 6) 100 mM cAMP. For the cGMP baits the elutions were 1) 100 mM ADP; 2) 100 mM GMP; 3) 10 mM cAMP; 4) 100 mM cAMP; 5) 10 mM cGMP and 6) 100 mM cGMP.
