# Supplementary material for: The arabidopsis cyclic nucleotide interactome
Source: PubMed Central journal article supplement (PMC4865018; doi:10.1186/s12964-016-0133-2), 2016-05-11
Supplement: 12964_2016_133_MOESM3_ESM.pdf [file 12964_2016_133_MOESM3_ESM.pdf]

### Additional file 3. Peptides identified in the Arabidopsis cyclic nucleotide binding protein candidates

| Protein     | MW (Da)           | Experiment  | Bait                | Fract | Protein ID prob | # uniq peptide | # total spectra     | % seq cover | Peptide sequence   | Peptide ID prob   |        |        |               |        |                  |          |
|-------------|-------------------|-------------|---------------------|-------|-----------------|----------------|---------------------|-------------|--------------------|-------------------|--------|--------|---------------|--------|------------------|----------|
| AT3G13920   | 46,704.90         | LEAF cAMP   | 2-[Biotin]-AHA-cAMP | bead  | 99.8%           | 2              | 2                   | 7.77%       | GLDVIQQAQSGTGK     | 95.0%             |        |        |               |        |                  |          |
|             |                   |             |                     |       |                 |                |                     |             | SRDHTVSATHGDMQNTNR | 95.0%             |        |        |               |        |                  |          |
|             |                   |             |                     |       |                 |                |                     |             | LEAF cGMP          | 2-AH-cGMP-agarose | bead   | 100.0% | 2             | 3      | 5.34%            | ELAQQIEK |
|             |                   | CALLUS cAMP | 2-AHA-cAMP-agarose  | bead  | 100.0%          | 6              | 9                   | 16.70%      | GLDVIQQAQSGTGK     | 95.0%             |        |        |               |        |                  |          |
|             |                   |             |                     |       |                 |                |                     |             | cGMP antibody      | bead              | 100.0% | 3      | 4             | 10.40% | DHTVSATHGDMQNTNR | 95.0%    |
|             |                   |             |                     |       |                 |                |                     |             | GLDVIQQAQSGTGK     | 95.0%             |        |        |               |        |                  |          |
|             |                   | CALLUS cAMP | 2-AHA-cAMP-agarose  | bead  | 100.0%          | 6              | 9                   | 16.70%      | MFVLDEADEMSLR      | 95.0%             |        |        |               |        |                  |          |
|             |                   |             |                     |       |                 |                |                     |             | ALGDYLVGK          | 95.0%             |        |        |               |        |                  |          |
|             |                   |             |                     |       |                 |                |                     |             | ELAQQIEK           | 95.0%             |        |        |               |        |                  |          |
|             |                   | CALLUS cAMP | 2-AHA-cAMP-agarose  | bead  | 100.0%          | 6              | 9                   | 16.70%      | FYNVVVEELPSNVADLL  | 95.0%             |        |        |               |        |                  |          |
|             |                   |             |                     |       |                 |                |                     |             | GLDVIQQAQSGTGK     | 95.0%             |        |        |               |        |                  |          |
|             |                   |             |                     |       |                 |                |                     |             | KVDWLTDK           | 95.0%             |        |        |               |        |                  |          |
|             |                   | CALLUS cAMP | 2-AHA-cAMP-agarose  | bead  | 100.0%          | 6              | 9                   | 16.70%      | MFVLDEADEMSLR      | 95.0%             |        |        |               |        |                  |          |
|             |                   |             |                     |       |                 |                |                     |             | ELAQQIEK           | 95.0%             |        |        |               |        |                  |          |
|             |                   |             |                     |       |                 |                |                     |             | 8-AEA-cAMP-agarose | bead              | 100.0% | 3      | 5             | 7.77%  | GLDVIQQAQSGTGK   | 95.0%    |
|             |                   | CALLUS cAMP | 2-[Biotin]-AHA-cAMP | bead  | 100.0%          | 3              | 5                   | 8.98%       | VLIITDLLAR         | 95.0%             |        |        |               |        |                  |          |
|             |                   |             |                     |       |                 |                |                     |             | GLDVIQQAQSGTGK     | 95.0%             |        |        |               |        |                  |          |
|             |                   |             |                     |       |                 |                |                     |             | MFVLDEADEMSLR      | 95.0%             |        |        |               |        |                  |          |
|             |                   | CALLUS cAMP | 2-AH-cGMP-agarose   | bead  | 100.0%          | 2              | 4                   | 6.55%       | VLIITDLLAR         | 95.0%             |        |        |               |        |                  |          |
|             |                   |             |                     |       |                 |                |                     |             | GLDVIQQAQSGTGK     | 95.0%             |        |        |               |        |                  |          |
|             |                   |             |                     |       |                 |                |                     |             | MFVLDEADEMSLR      | 95.0%             |        |        |               |        |                  |          |
|             |                   | CALLUS cGMP | 2-AH-cGMP-agarose   | bead  | 100.0%          | 2              | 5                   | 7.52%       | MFVLDEADEMSLR      | 95.0%             |        |        |               |        |                  |          |
|             |                   |             |                     |       |                 |                |                     |             | SRDHTVSATHGDMQNTNR | 95.0%             |        |        |               |        |                  |          |
|             |                   |             |                     |       |                 |                |                     |             | 8-AET-cGMP-agarose | bead              | 100.0% | 5      | 6             | 12.90% | ELAQQIEK         | 95.0%    |
|             |                   | CALLUS cGMP | 2-AH-cGMP-agarose   | bead  | 100.0%          | 2              | 5                   | 7.52%       | GLDVIQQAQSGTGK     | 95.0%             |        |        |               |        |                  |          |
|             |                   |             |                     |       |                 |                |                     |             | KVDWLTDK           | 95.0%             |        |        |               |        |                  |          |
|             |                   |             |                     |       |                 |                |                     |             | MFVLDEADEMSLR      | 95.0%             |        |        |               |        |                  |          |
| CALLUS cGMP | 2-AH-cGMP-agarose | bead        | 100.0%              | 2     | 5               | 7.52%          | VLIITDLLAR          | 95.0%       |                    |                   |        |        |               |        |                  |          |
|             |                   |             |                     |       |                 |                | 2-[Biotin]-AH-cGMP  | bead        | 100.0%             | 5                 | 9      | 15.30% | ELAQQIEK      | 94.7%  |                  |          |
|             |                   |             |                     |       |                 |                | GLDVIQQAQSGTGK      | 95.0%       |                    |                   |        |        |               |        |                  |          |
| CALLUS cGMP | 2-AH-cGMP-agarose | bead        | 100.0%              | 2     | 5               | 7.52%          | MFVLDEADEMSLR       | 95.0%       |                    |                   |        |        |               |        |                  |          |
|             |                   |             |                     |       |                 |                | SRDHTVSATHGDMQNTNR  | 95.0%       |                    |                   |        |        |               |        |                  |          |
|             |                   |             |                     |       |                 |                | VLIITDLLAR          | 95.0%       |                    |                   |        |        |               |        |                  |          |
| CALLUS cGMP | 2-AH-cGMP-agarose | bead        | 100.0%              | 2     | 5               | 7.52%          | DHTVSATHGDMQNTNR    | 95.0%       |                    |                   |        |        |               |        |                  |          |
|             |                   |             |                     |       |                 |                | ELAQQIEK            | 95.0%       |                    |                   |        |        |               |        |                  |          |
|             |                   |             |                     |       |                 |                | GLDVIQQAQSGTGK      | 95.0%       |                    |                   |        |        |               |        |                  |          |
| CALLUS cGMP | 2-AH-cGMP-agarose | bead        | 100.0%              | 2     | 5               | 7.52%          | MFVLDEADEMSLR       | 95.0%       |                    |                   |        |        |               |        |                  |          |
|             |                   |             |                     |       |                 |                | ELDYLVGAVSNPK       | 95.0%       |                    |                   |        |        |               |        |                  |          |
|             |                   |             |                     |       |                 |                | FSLAPLVPR           | 95.0%       |                    |                   |        |        |               |        |                  |          |
| CALLUS cGMP | 2-AH-cGMP-agarose | bead        | 100.0%              | 2     | 5               | 7.52%          | LASLADLYVNDAFGTAHR  | 95.0%       |                    |                   |        |        |               |        |                  |          |
|             |                   |             |                     |       |                 |                | ELDYLVGAVSNPK       | 95.0%       |                    |                   |        |        |               |        |                  |          |
|             |                   |             |                     |       |                 |                | FLKPSVAGFLLQK       | 95.0%       |                    |                   |        |        |               |        |                  |          |
| CALLUS cGMP | 2-AH-cGMP-agarose | bead        | 100.0%              | 2     | 5               | 7.52%          | FSLAPLVPR           | 95.0%       |                    |                   |        |        |               |        |                  |          |
|             |                   |             |                     |       |                 |                | GVTTIIGGGDSVAAVEK   | 95.0%       |                    |                   |        |        |               |        |                  |          |
|             |                   |             |                     |       |                 |                | 2-[Biotin]-AHA-cAMP | bead        | 100.0%             | 5                 | 8      | 14.30% | ELDYLVGAVSNPK | 95.0%  |                  |          |
| CALLUS cGMP | 2-AH-cGMP-agarose | bead        | 100.0%              | 2     | 5               | 7.52%          | FAAGTEAIANK         | 95.0%       |                    |                   |        |        |               |        |                  |          |
|             |                   |             |                     |       |                 |                | FSLAPLVPR           | 95.0%       |                    |                   |        |        |               |        |                  |          |
|             |                   |             |                     |       |                 |                | GVTTIIGGGDSVAAVEK   | 95.0%       |                    |                   |        |        |               |        |                  |          |
| CALLUS cGMP | 2-AH-cGMP-agarose | bead        | 100.0%              | 2     | 5               | 7.52%          | KLASLADLYVNDAFGTAHR | 95.0%       |                    |                   |        |        |               |        |                  |          |
|             |                   |             |                     |       |                 |                | cAMP antibody       | bead        | 100.0%             | 9                 | 12     | 22.50% | AAIPTIK       | 95.0%  |                  |          |

|           |           |           |                     |         |        |    |    |        |                           |       |
|-----------|-----------|-----------|---------------------|---------|--------|----|----|--------|---------------------------|-------|
|           |           |           |                     |         |        |    |    |        | AQGLSVGSSLVEEDKLELATELLAK | 95.0% |
|           |           |           |                     |         |        |    |    |        | ELDYLVGAVSNPK             | 95.0% |
|           |           |           |                     |         |        |    |    |        | FAAGTEAIANK               | 95.0% |
|           |           |           |                     |         |        |    |    |        | FSLAPLVPR                 | 95.0% |
|           |           |           |                     |         |        |    |    |        | GVTTIIGGGDSVAAVEK         | 95.0% |
|           |           |           |                     |         |        |    |    |        | KLASLADLYVNDAFGTAHR       | 95.0% |
|           |           |           |                     |         |        |    |    |        | LAELSEK                   | 95.0% |
|           |           |           |                     |         |        |    |    |        | LASLADLYVNDAFGTAHR        | 95.0% |
|           |           | LEAF cGMP | 2-AH-cGMP-agarose   | bead    | 100.0% | 3  | 5  | 9.36%  | AAIPTIK                   | 95.0% |
|           |           |           |                     |         |        |    |    |        | AQGLSVGSSLVEEDKLELATELLAK | 95.0% |
|           |           |           |                     |         |        |    |    |        | ELDYLVGAVSNPK             | 95.0% |
|           |           |           | 8-AET-cGMP-agarose  | bead    | 100.0% | 2  | 5  | 4.57%  | ELDYLVGAVSNPK             | 95.0% |
|           |           |           |                     |         |        |    |    |        | FSLAPLVPR                 | 95.0% |
|           |           |           | 2-[Biotin]-AH-cGMP  | bead    | 100.0% | 8  | 12 | 18.10% | AAIPTIK                   | 95.0% |
|           |           |           |                     |         |        |    |    |        | ELDYLVGAVSNPK             | 95.0% |
|           |           |           |                     |         |        |    |    |        | FAAGTEAIANK               | 95.0% |
|           |           |           |                     |         |        |    |    |        | FSLAPLVPR                 | 95.0% |
|           |           |           |                     |         |        |    |    |        | GVTTIIGGGDSVAAVEK         | 95.0% |
|           |           |           |                     |         |        |    |    |        | KLASLADLYVNDAFGTAHR       | 95.0% |
|           |           |           |                     |         |        |    |    |        | LASLADLYVNDAFGTAHR        | 95.0% |
|           |           |           |                     |         |        |    |    |        | SVGDLTSADLK               | 95.0% |
|           |           |           | cGMP antibody       | bead    | 100.0% | 8  | 9  | 18.50% | AAIPTIK                   | 95.0% |
|           |           |           |                     |         |        |    |    |        | ELDYLVGAVSNPK             | 95.0% |
|           |           |           |                     |         |        |    |    |        | FLKPSVAGFLLQK             | 95.0% |
|           |           |           |                     |         |        |    |    |        | FSLAPLVPR                 | 95.0% |
|           |           |           |                     |         |        |    |    |        | GVTTIIGGGDSVAAVEK         | 95.0% |
|           |           |           |                     |         |        |    |    |        | KLASLADLYVNDAFGTAHR       | 95.0% |
|           |           |           |                     |         |        |    |    |        | LASLADLYVNDAFGTAHR        | 95.0% |
|           |           |           |                     |         |        |    |    |        | SVGDLTSADLK               | 95.0% |
| AT1G42970 | 47,659.30 | LEAF cAMP | 2-AHA-cAMP-agarose  | bead    | 100.0% | 4  | 4  | 20.40% | AVSLVLPQLK                | 95.0% |
|           |           |           |                     |         |        |    |    |        | DSPLEVVLNDSSGGVK          | 95.0% |
|           |           |           |                     |         |        |    |    |        | IVDNETISVDGK              | 95.0% |
|           |           |           |                     |         |        |    |    |        | VIIITAPAK                 | 95.0% |
|           |           |           | 8-AEA-cAMP-agarose  | bead    | 100.0% | 6  | 6  | 20.10% | AVSLVLPQLK                | 95.0% |
|           |           |           |                     |         |        |    |    |        | GLTAEDVNEAFR              | 95.0% |
|           |           |           |                     |         |        |    |    |        | GLTAEDVNEAFRK             | 94.9% |
|           |           |           |                     |         |        |    |    |        | IVDNETISVDGK              | 95.0% |
|           |           |           |                     |         |        |    |    |        | VIIITAPAK                 | 95.0% |
|           |           |           |                     |         |        |    |    |        | VLDEEFGIVK                | 95.0% |
|           |           |           | 2-[Biotin]-AHA-cAMP | bead    | 100.0% | 6  | 9  | 20.60% | AVSLVLPQLK                | 95.0% |
|           |           |           |                     |         |        |    |    |        | GLTAEDVNEAFR              | 95.0% |
|           |           |           |                     |         |        |    |    |        | IVDNETISVDGK              | 95.0% |
|           |           |           |                     |         |        |    |    |        | VIIITAPAK                 | 95.0% |
|           |           |           |                     |         |        |    |    |        | VLDEEFGIVK                | 95.0% |
|           |           |           |                     |         |        |    |    |        | VVDLAHLVASK               | 95.0% |
|           |           |           | cAMP antibody       | AMP     | 99.9%  | 2  | 3  | 12.80% | IVDNETISVDGK              | 95.0% |
|           |           |           |                     |         |        |    |    |        | VIIITAPAK                 | 95.0% |
|           |           |           |                     | 10 cGMP | 99.8%  | 2  | 2  | 6.94%  | VIIITAPAK                 | 95.0% |
|           |           |           |                     |         |        |    |    |        | YDSMLGTFK                 | 95.0% |
|           |           |           |                     | bead    | 100.0% | 10 | 18 | 32.20% | AVSLVLPQLK                | 95.0% |
|           |           |           |                     |         |        |    |    |        | DSPLEVVLNDSSGGVK          | 95.0% |
|           |           |           |                     |         |        |    |    |        | GLTAEDVNEAFR              | 95.0% |
|           |           |           |                     |         |        |    |    |        | GLTAEDVNEAFRK             | 95.0% |
|           |           |           |                     |         |        |    |    |        | IVDNETISVDGK              | 95.0% |
|           |           |           |                     |         |        |    |    |        | VIIITAPAK                 | 95.0% |

|           |           |           |                     |         |        |   |    |        |                      |       |
|-----------|-----------|-----------|---------------------|---------|--------|---|----|--------|----------------------|-------|
|           |           |           |                     |         |        |   |    |        | VLDEEFGIVK           | 95.0% |
|           |           |           |                     |         |        |   |    |        | VPTPNVSVVDLVINVEKK   | 95.0% |
|           |           |           |                     |         |        |   |    |        | VVDLAHLVASK          | 95.0% |
|           |           |           |                     |         |        |   |    |        | YDSMLGTFK            | 95.0% |
|           |           | LEAF cGMP | 2-AH-cGMP-agarose   | bead    | 100.0% | 6 | 11 | 23.30% | AVSLVLPQLK           | 95.0% |
|           |           |           |                     |         |        |   |    |        | DSPLEVVVLNDSGGVK     | 95.0% |
|           |           |           |                     |         |        |   |    |        | GLTAEDVNEAFR         | 95.0% |
|           |           |           |                     |         |        |   |    |        | IVDNETISVDGK         | 95.0% |
|           |           |           |                     |         |        |   |    |        | VIIITAPAK            | 95.0% |
|           |           |           | 8-AET-cGMP-agarose  | bead    | 100.0% | 5 | 9  | 21.50% | VLDEEFGIVK           | 95.0% |
|           |           |           |                     |         |        |   |    |        | AVSLVLPQLK           | 95.0% |
|           |           |           |                     |         |        |   |    |        | DSPLEVVVLNDSGGVK     | 95.0% |
|           |           |           |                     |         |        |   |    |        | IVDNETISVDGK         | 95.0% |
|           |           |           |                     |         |        |   |    |        | VLDEEFGIVK           | 95.0% |
|           |           |           |                     |         |        |   |    |        | VVDLAHLVASK          | 95.0% |
|           |           |           | 2-[Biotin]-AH-cGMP  | bead    | 100.0% | 8 | 10 | 28.20% | AVSLVLPQLK           | 95.0% |
|           |           |           |                     |         |        |   |    |        | DSPLEVVVLNDSGGVK     | 95.0% |
|           |           |           |                     |         |        |   |    |        | GLTAEDVNEAFR         | 95.0% |
|           |           |           |                     |         |        |   |    |        | IVDNETISVDGK         | 95.0% |
|           |           |           |                     |         |        |   |    |        | VIIITAPAK            | 95.0% |
|           |           |           |                     |         |        |   |    |        | VLDEEFGIVK           | 95.0% |
|           |           |           |                     |         |        |   |    |        | VPTPNVSVVDLVINVEKK   | 95.0% |
|           |           |           |                     |         |        |   |    |        | VVDLAHLVASK          | 95.0% |
|           |           |           | cGMP antibody       | bead    | 100.0% | 7 | 12 | 23.70% | AVSLVLPQLK           | 95.0% |
|           |           |           |                     |         |        |   |    |        | GLTAEDVNEAFR         | 95.0% |
|           |           |           |                     |         |        |   |    |        | IVDNETISVDGK         | 95.0% |
|           |           |           |                     |         |        |   |    |        | VIIITAPAK            | 95.0% |
|           |           |           |                     |         |        |   |    |        | VLDEEFGIVK           | 95.0% |
|           |           |           |                     |         |        |   |    |        | VVAWYDNEWGYSQR       | 95.0% |
|           |           |           |                     |         |        |   |    |        | VVDLAHLVASK          | 95.0% |
| AT4G20360 | 51,630.70 | LEAF cAMP | 2-AHA-cAMP-agarose  | bead    | 100.0% | 4 | 4  | 12.40% | ILDEALAGDNVGLLLR     | 95.0% |
|           |           |           |                     |         |        |   |    |        | SYTVTGVEVFQK         | 95.0% |
|           |           |           |                     |         |        |   |    |        | TTLTAALTMALASIGSSVAK | 95.0% |
|           |           |           |                     |         |        |   |    |        | VGETVDLVGLR          | 95.0% |
|           |           |           | 8-AEA-cAMP-agarose  | bead    | 100.0% | 3 | 4  | 7.35%  | KYDEIDAAPEER         | 95.0% |
|           |           |           |                     |         |        |   |    |        | SYTVTGVEVFQK         | 95.0% |
|           |           |           |                     |         |        |   |    |        | VGETVDLVGLR          | 95.0% |
|           |           |           | 2-[Biotin]-AHA-cAMP | bead    | 100.0% | 4 | 7  | 12.20% | ILDEALAGDNVGLLLR     | 95.0% |
|           |           |           |                     |         |        |   |    |        | KYDEIDAAPEER         | 95.0% |
|           |           |           |                     |         |        |   |    |        | QTELPFLLAEDVFSITGR   | 95.0% |
|           |           |           |                     |         |        |   |    |        | VGETVDLVGLR          | 95.0% |
|           |           |           | cAMP antibody       | AMP     | 100.0% | 3 | 3  | 8.19%  | GITINTATVEYETENR     | 95.0% |
|           |           |           |                     |         |        |   |    |        | SYTVTGVEVFQK         | 95.0% |
|           |           |           |                     |         |        |   |    |        | VGETVDLVGLR          | 95.0% |
|           |           |           |                     | 10 cGMP | 100.0% | 3 | 3  | 8.19%  | GITINTATVEYETENR     | 95.0% |
|           |           |           |                     |         |        |   |    |        | SYTVTGVEVFQK         | 95.0% |
|           |           |           |                     |         |        |   |    |        | VGETVDLVGLR          | 95.0% |
|           |           |           |                     | bead    | 100.0% | 7 | 9  | 21.40% | BHILLAK              | 95.0% |
|           |           |           |                     |         |        |   |    |        | GITINTATVEYETENR     | 95.0% |
|           |           |           |                     |         |        |   |    |        | ILDEALAGDNVGLLLR     | 95.0% |
|           |           |           |                     |         |        |   |    |        | KYDEIDAAPEER         | 95.0% |
|           |           |           |                     |         |        |   |    |        | QTELPFLLAEDVFSITGR   | 95.0% |
|           |           |           |                     |         |        |   |    |        | SYTVTGVEVFQK         | 95.0% |
|           |           |           |                     |         |        |   |    |        | TTLTAALTMALASIGSSVAK | 95.0% |
|           |           | LEAF cGMP | 2-AH-cGMP-agarose   | bead    | 100.0% | 4 | 9  | 11.60% | GITINTATVEYETENR     | 95.0% |

|           |           |           |                     |      |        |   |   |        |                       |       |
|-----------|-----------|-----------|---------------------|------|--------|---|---|--------|-----------------------|-------|
|           |           |           |                     |      |        |   |   |        | ILDEALAGDNVGLLLR      | 95.0% |
|           |           |           |                     |      |        |   |   |        | KYDEIDAAPEER          | 95.0% |
|           |           |           |                     |      |        |   |   |        | VGETVDLVGLR           | 95.0% |
|           |           |           | 8-AET-cGMP-agarose  | bead | 100.0% | 4 | 5 | 12.40% | ILDEALAGDNVGLLLR      | 95.0% |
|           |           |           |                     |      |        |   |   |        | KYDEIDAAPEER          | 95.0% |
|           |           |           |                     |      |        |   |   |        | TTLTAALTMALASIGSSVAK  | 95.0% |
|           |           |           |                     |      |        |   |   |        | VGETVDLVGLR           | 95.0% |
|           |           |           | 2-[Biotin]-AH-cGMP  | bead | 100.0% | 3 | 6 | 8.19%  | ILDEALAGDNVGLLLR      | 95.0% |
|           |           |           |                     |      |        |   |   |        | KYDEIDAAPEER          | 95.0% |
|           |           |           |                     |      |        |   |   |        | VGETVDLVGLR           | 95.0% |
|           |           |           | cGMP antibody       | bead | 100.0% | 4 | 5 | 10.70% | ILDEALAGDNVGLLLR      | 95.0% |
|           |           |           |                     |      |        |   |   |        | KYDEIDAAPEER          | 95.0% |
|           |           |           |                     |      |        |   |   |        | SYVTGVEMFQK           | 95.0% |
|           |           |           |                     |      |        |   |   |        | VGETVDLVGLR           | 95.0% |
| AT3G60750 | 79,970.10 | LEAF cAMP | 8-AEA-cAMP-agarose  | bead | 100.0% | 7 | 7 | 9.99%  | FLAIDAVEK             | 95.0% |
|           |           |           |                     |      |        |   |   |        | HTPEGATLESWDSAK       | 95.0% |
|           |           |           |                     |      |        |   |   |        | KYPEEASELK            | 95.0% |
|           |           |           |                     |      |        |   |   |        | NLSQQCLNALAK          | 95.0% |
|           |           |           |                     |      |        |   |   |        | NPYWFNR               | 95.0% |
|           |           |           |                     |      |        |   |   |        | TPSILALSR             | 95.0% |
|           |           |           |                     |      |        |   |   |        | VTTTIGYGSPNK          | 95.0% |
|           |           |           | 2-[Biotin]-AHA-cAMP | bead | 100.0% | 3 | 3 | 5.40%  | ALPTYTPESPGDATR       | 94.5% |
|           |           |           |                     |      |        |   |   |        | SIITGELPAGWEK         | 95.0% |
|           |           |           |                     |      |        |   |   |        | VTTTIGYGSPNK          | 95.0% |
|           |           |           | cAMP antibody       | bead | 100.0% | 3 | 3 | 5.80%  | AMPNTLMFRPADGNETAGAYK | 95.0% |
|           |           |           |                     |      |        |   |   |        | KYPEEASELK            | 95.0% |
|           |           |           |                     |      |        |   |   |        | NLSQQCLNALAK          | 95.0% |
|           |           | LEAF cGMP | 2-AH-cGMP-agarose   | bead | 100.0% | 7 | 7 | 11.30% | AMPNTLMFRPADGNETAGAYK | 95.0% |
|           |           |           |                     |      |        |   |   |        | ANSYSVHGAALGEK        | 95.0% |
|           |           |           |                     |      |        |   |   |        | ANSYSVHGAALGEKEVEATR  | 95.0% |
|           |           |           |                     |      |        |   |   |        | FLAIDAVEK             | 95.0% |
|           |           |           |                     |      |        |   |   |        | NLSQQCLNALAK          | 95.0% |
|           |           |           |                     |      |        |   |   |        | SIITGELPAGWEK         | 95.0% |
|           |           |           |                     |      |        |   |   |        | TPSILALSR             | 95.0% |
|           |           |           | 8-AET-cGMP-agarose  | bead | 100.0% | 3 | 3 | 5.53%  | KYPEEASELK            | 95.0% |
|           |           |           |                     |      |        |   |   |        | SIGINSFGASAPAPLLYK    | 95.0% |
|           |           |           |                     |      |        |   |   |        | SIITGELPAGWEK         | 95.0% |
|           |           |           | 2-[Biotin]-AH-cGMP  | bead | 100.0% | 8 | 9 | 12.00% | ANSYSVHGAALGEK        | 95.0% |
|           |           |           |                     |      |        |   |   |        | ANSYSVHGAALGEKEVEATR  | 95.0% |
|           |           |           |                     |      |        |   |   |        | FLAIDAVEK             | 95.0% |
|           |           |           |                     |      |        |   |   |        | NLSQQCLNALAK          | 95.0% |
|           |           |           |                     |      |        |   |   |        | SIGINSFGASAPAPLLYK    | 95.0% |
|           |           |           |                     |      |        |   |   |        | TPSILALSR             | 95.0% |
|           |           |           |                     |      |        |   |   |        | VTTTIGYGSPNK          | 95.0% |
|           |           |           |                     |      |        |   |   |        | YPEEASELK             | 94.9% |
|           |           |           | cGMP antibody       | bead | 100.0% | 3 | 3 | 4.99%  | NLSQQCLNALAK          | 95.0% |
|           |           |           |                     |      |        |   |   |        | SIITGELPAGWEK         | 95.0% |
|           |           |           |                     |      |        |   |   |        | VTTTIGYGSPNK          | 95.0% |
| AT5G50920 | 103455.6  | LEAF cAMP | 2-AHA-cAMP-agarose  | bead | 99.8%  | 2 | 2 | 2.48%  | HIERDPALER            | 95.0% |
|           |           |           |                     |      |        |   |   |        | VLENLGADPSNIR         | 95.0% |
|           |           |           | 8-AEA-cAMP-agarose  | bead | 100.0% | 4 | 4 | 4.63%  | AEVSAIQAK             | 95.0% |
|           |           |           |                     |      |        |   |   |        | AIDLIDEAGSR           | 95.0% |
|           |           |           |                     |      |        |   |   |        | TAIAEGLAQR            | 95.0% |
|           |           |           |                     |      |        |   |   |        | VLENLGADPSNIR         | 95.0% |
|           |           |           | 2-[Biotin]-AHA-cAMP | bead | 100.0% | 3 | 3 | 3.55%  | AIDLIDEAGSR           | 95.0% |

|           |           |           |                     |      |        |   |    |        |                       |       |
|-----------|-----------|-----------|---------------------|------|--------|---|----|--------|-----------------------|-------|
|           |           |           |                     |      |        |   |    |        | HAQVPEEAR             | 95.0% |
|           |           |           |                     |      |        |   |    |        | VLENLGADPSNIR         | 95.0% |
|           |           |           | cAMP antibody       | bead | 100.0% | 3 | 3  | 3.66%  | AIDLIDEAGSR           | 95.0% |
|           |           |           |                     |      |        |   |    |        | TAIAEGLAQR            | 95.0% |
|           |           |           |                     |      |        |   |    |        | VLENLGADPSNIR         | 95.0% |
|           |           | LEAF cGMP | 2-AH-cGMP-agarose   | bead | 100.0% | 3 | 3  | 3.23%  | LLEDMAEK              | 94.8% |
|           |           |           |                     |      |        |   |    |        | SLVTEELK              | 95.0% |
|           |           |           |                     |      |        |   |    |        | VLENLGADPSNIR         | 95.0% |
|           |           |           | 8-AET-cGMP-agarose  | bead | 100.0% | 4 | 4  | 5.06%  | GSGFVAVEIPFTR         | 95.0% |
|           |           |           |                     |      |        |   |    |        | HIEKDPALER            | 95.0% |
|           |           |           |                     |      |        |   |    |        | TAIAEGLAQR            | 95.0% |
|           |           |           |                     |      |        |   |    |        | VLENLGADPSNIR         | 94.6% |
|           |           |           | 2-[Biotin]-AH-cGMP  | bead | 100.0% | 4 | 4  | 5.60%  | LDMSEFMER             | 95.0% |
|           |           |           |                     |      |        |   |    |        | MVGENNEVTANVGGSSSNK   | 95.0% |
|           |           |           |                     |      |        |   |    |        | TAIAEGLAQR            | 95.0% |
|           |           |           |                     |      |        |   |    |        | VLENLGADPSNIR         | 95.0% |
| AT4G37930 | 57,401.70 | LEAF cAMP | 2-AHA-cAMP-agarose  | AMP  | 99.8%  | 2 | 2  | 3.68%  | FAQTLMER              | 95.0% |
|           |           |           |                     |      |        |   |    |        | LIVAGASAYAR           | 95.0% |
|           |           |           |                     | bead | 100.0% | 3 | 3  | 6.96%  | LIVAGASAYAR           | 95.0% |
|           |           |           |                     |      |        |   |    |        | NTVPGDVSAMVPGGIR      | 95.0% |
|           |           |           |                     |      |        |   |    |        | YSEGYPGAR             | 95.0% |
|           |           |           | 8-AEA-cAMP-agarose  | bead | 100.0% | 5 | 6  | 9.48%  | AYQEQLVLSNSAK         | 95.0% |
|           |           |           |                     |      |        |   |    |        | FAQTLMER              | 95.0% |
|           |           |           |                     |      |        |   |    |        | MGTPALTSR             | 95.0% |
|           |           |           |                     |      |        |   |    |        | VLEAVHIASNK           | 95.0% |
|           |           |           |                     |      |        |   |    |        | YSEGYPGAR             | 95.0% |
|           |           |           | 2-[Biotin]-AHA-cAMP | GDP  | 100.0% | 8 | 17 | 12.80% | AYQEQLVLSNSAK         | 95.0% |
|           |           |           |                     |      |        |   |    |        | FAQTLMER              | 95.0% |
|           |           |           |                     |      |        |   |    |        | GAMIFFR               | 95.0% |
|           |           |           |                     |      |        |   |    |        | HEVEEFAK              | 95.0% |
|           |           |           |                     |      |        |   |    |        | LRHEVEEFAK            | 95.0% |
|           |           |           |                     |      |        |   |    |        | MGTPALTSR             | 95.0% |
|           |           |           |                     |      |        |   |    |        | VLEAVHIASNK           | 95.0% |
|           |           |           |                     |      |        |   |    |        | YSEGYPGAR             | 95.0% |
|           |           |           |                     | bead | 100.0% | 6 | 6  | 15.70% | GYELVSGGTDNHLVLVNLKPK | 95.0% |
|           |           |           |                     |      |        |   |    |        | LRHEVEEFAK            | 95.0% |
|           |           |           |                     |      |        |   |    |        | MGTPALTSR             | 95.0% |
|           |           |           |                     |      |        |   |    |        | QLNAPLEEVDP EIADIEHEK | 95.0% |
|           |           |           |                     |      |        |   |    |        | VLEAVHIASNK           | 95.0% |
|           |           |           |                     |      |        |   |    |        | YSEGYPGAR             | 95.0% |
|           |           |           | cAMP antibody       | bead | 100.0% | 3 | 3  | 6.00%  | AYQEQLVLSNSAK         | 95.0% |
|           |           |           |                     |      |        |   |    |        | LRHEVEEFAK            | 95.0% |
|           |           |           |                     |      |        |   |    |        | YSEGYPGAR             | 95.0% |
|           |           | LEAF cGMP | 2-AH-cGMP-agarose   | bead | 100.0% | 4 | 4  | 12.00% | LKDFVSAMESSTIQSEIAK   | 95.0% |
|           |           |           |                     |      |        |   |    |        | LRHEVEEFAK            | 95.0% |
|           |           |           |                     |      |        |   |    |        | QLNAPLEEVDP EIADIEHEK | 95.0% |
|           |           |           |                     |      |        |   |    |        | VLEAVHIASNK           | 95.0% |
|           |           |           | 8-AET-cGMP-agarose  | bead | 100.0% | 3 | 3  | 6.96%  | AYQEQLVLSNSAK         | 95.0% |
|           |           |           |                     |      |        |   |    |        | FAQTLMER              | 95.0% |
|           |           |           |                     |      |        |   |    |        | NTVPGDVSAMVPGGIR      | 94.9% |
|           |           |           | 2-[Biotin]-AH-cGMP  | GMP  | 100.0% | 6 | 9  | 12.20% | AYQEQLVLSNSAK         | 95.0% |
|           |           |           |                     |      |        |   |    |        | FAQTLMER              | 95.0% |
|           |           |           |                     |      |        |   |    |        | MGTPALTSR             | 95.0% |
|           |           |           |                     |      |        |   |    |        | NTVPGDVSAMVPGGIR      | 95.0% |
|           |           |           |                     |      |        |   |    |        | QFPTIGFEK             | 95.0% |

|                                     |           |             |                     |         |        |   |    |        |                                |       |
|-------------------------------------|-----------|-------------|---------------------|---------|--------|---|----|--------|--------------------------------|-------|
|                                     |           |             |                     |         |        |   |    |        | YSEGYPGAR                      | 95.0% |
|                                     |           |             |                     | 10 cAMP | 100.0% | 2 | 2  | 3.48%  | MGTPALTSR                      | 95.0% |
|                                     |           |             |                     |         |        |   |    |        | YSEGYPGAR                      | 95.0% |
|                                     |           |             |                     | beads   | 100.0% | 7 | 9  | 16.60% | AYQEQVLSNSAK                   | 95.0% |
|                                     |           |             |                     |         |        |   |    |        | FAQTLMER                       | 95.0% |
|                                     |           |             |                     |         |        |   |    |        | LKDFVSAMESSTIQSEIAK            | 95.0% |
|                                     |           |             |                     |         |        |   |    |        | LRHEVEEFAK                     | 95.0% |
|                                     |           |             |                     |         |        |   |    |        | NTVPGDVSAMVPGGIR               | 95.0% |
|                                     |           |             |                     |         |        |   |    |        | VLEAVHIASNK                    | 95.0% |
|                                     |           |             |                     |         |        |   |    |        | YSEGYPGAR                      | 95.0% |
| AT3G14420                           | 39,463.60 | LEAF cAMP   | 8-AEA-cAMP-agarose  | bead    | 100.0% | 3 | 3  | 8.33%  | FFQLYVYK                       | 95.0% |
|                                     |           |             |                     |         |        |   |    |        | FTLPPNLTLK                     | 95.0% |
|                                     |           |             |                     |         |        |   |    |        | MAHPDGEYATAR                   | 95.0% |
|                                     |           |             | cAMP antibody       | bead    | 100.0% | 7 | 7  | 26.90% | AASAAGTIMTLSSWATSSVEEVASTGPGIR | 95.0% |
|                                     |           |             |                     |         |        |   |    |        | AIALTVDTPR                     | 95.0% |
|                                     |           |             |                     |         |        |   |    |        | GVLGTEDAR                      | 95.0% |
|                                     |           |             |                     |         |        |   |    |        | IPVFLDGGVR                     | 95.0% |
|                                     |           |             |                     |         |        |   |    |        | MAHPDGEYATAR                   | 95.0% |
|                                     |           |             |                     |         |        |   |    |        | NFEGLDL GK                     | 95.0% |
|                                     |           |             |                     |         |        |   |    |        | QLDYVPATISALEEVVK              | 95.0% |
|                                     |           | LEAF cGMP   | 2-[Biotin]-AH-cGMP  | bead    | 100.0% | 2 | 2  | 6.11%  | AIALTVDTPR                     | 95.0% |
|                                     |           |             |                     |         |        |   |    |        | MAHPDGEYATAR                   | 95.0% |
|                                     |           |             | cGMP antibody       | bead    | 100.0% | 3 | 3  | 10.00% | AIALTVDTPR                     | 95.0% |
|                                     |           |             |                     |         |        |   |    |        | GVLGTEDAR                      | 95.0% |
|                                     |           |             |                     |         |        |   |    |        | QLDYVPATISALEEVVK              | 95.0% |
| AT4G09650                           | 25,669.10 | LEAF cAMP   | 2-[Biotin]-AHA-cAMP | bead    | 99.9%  | 2 | 2  | 9.83%  | QVIDDIVK                       | 95.0% |
|                                     |           |             |                     |         |        |   |    |        | SVVKLEAPQLAQIAK                | 95.0% |
|                                     |           | LEAF cGMP   | 2-AH-cGMP-agarose   | bead    | 100.0% | 2 | 2  | 8.97%  | LEAPQLAQIAK                    | 95.0% |
|                                     |           |             |                     |         |        |   |    |        | LTDTQLAEVR                     | 95.0% |
|                                     |           |             | 8-AET-cGMP-agarose  | bead    | 100.0% | 4 | 4  | 22.60% | LTDTQLAEVR                     | 95.0% |
|                                     |           |             |                     |         |        |   |    |        | QVIDDIVK                       | 95.0% |
|                                     |           |             |                     |         |        |   |    |        | SSSLQSHTSNFLNVLVDANR           | 95.0% |
|                                     |           |             |                     |         |        |   |    |        | SVVKLEAPQLAQIAK                | 95.0% |
|                                     |           |             | 2-[Biotin]-AH-cGMP  | bead    | 99.8%  | 2 | 2  | 7.69%  | LTDTQLAEVR                     | 95.0% |
|                                     |           |             |                     |         |        |   |    |        | QVIDDIVK                       | 95.0% |
| AT1G09340                           | 42,621.40 | LEAF cAMP   | 2-[Biotin]-AHA-cAMP | GDP     | 100.0% | 7 | 10 | 22.50% | DLATAFLNVLGNEK                 | 95.0% |
|                                     |           |             |                     |         |        |   |    |        | EADFTTDDMILSK                  | 95.0% |
|                                     |           |             |                     |         |        |   |    |        | EAEVEPILEALPK                  | 95.0% |
|                                     |           |             |                     |         |        |   |    |        | EIFNISGEK                      | 95.0% |
|                                     |           |             |                     |         |        |   |    |        | LETESLLQSK                     | 95.0% |
|                                     |           |             |                     |         |        |   |    |        | QLPGESDQDFADFSSK               | 95.0% |
|                                     |           |             |                     |         |        |   |    |        | YVTFDGLAK                      | 95.0% |
|                                     |           |             | cAMP antibody       | bead    | 100.0% | 2 | 3  | 7.94%  | DLATAFLNVLGNEK                 | 95.0% |
|                                     |           |             |                     |         |        |   |    |        | QLPGESDQDFADFSSK               | 95.0% |
|                                     |           | LEAF cGMP   | 2-AH-cGMP-agarose   | bead    | 99.8%  | 2 | 4  | 7.41%  | DLATAFLNVLGNEK                 | 95.0% |
|                                     |           |             |                     |         |        |   |    |        | EAEVEPILEALPK                  | 95.0% |
|                                     |           |             | 2-[Biotin]-AH-cGMP  | GMP     | 100.0% | 2 | 3  | 7.14%  | EADFTTDDMILSK                  | 95.0% |
|                                     |           |             |                     |         |        |   |    |        | EAEVEPILEALPK                  | 95.0% |
|                                     |           |             |                     | bead    | 100.0% | 3 | 5  | 9.79%  | DLATAFLNVLGNEK                 | 95.0% |
|                                     |           |             |                     |         |        |   |    |        | EAEVEPILEALPK                  | 95.0% |
|                                     |           |             |                     |         |        |   |    |        | EIFNISGEK                      | 95.0% |
| AT1G56330<br>AT3G62560<br>AT4G02080 | 21,987.60 | CALLUS cAMP | 2-AHA-cAMP-agarose  | bead    | 100.0% | 3 | 3  | 14.50% | IDIPYAASEDELK                  | 95.0% |
|                                     |           |             |                     |         |        |   |    |        | VDAVVYLVDAIDK                  | 95.0% |

|           |           |             |                     |      |        |   |   |        |                       |       |
|-----------|-----------|-------------|---------------------|------|--------|---|---|--------|-----------------------|-------|
|           |           |             |                     |      |        |   |   |        | VDAVVYLVDAVDKER       | 95.0% |
|           |           | CALLUS cGMP | 8-AET-cGMP-agarose  | bead | 100.0% | 2 | 3 | 9.84%  | AFDLGGHQIAR           | 95.0% |
|           |           |             |                     |      |        |   |   |        | MGYGEGFK              | 95.0% |
|           |           |             | cGMP antibody       | bead | 100.0% | 3 | 3 | 20.20% | IDIPYAASEDELK         | 95.0% |
|           |           |             |                     |      |        |   |   |        | ILFLGLDNAGK           | 95.0% |
|           |           |             |                     |      |        |   |   |        | VDAVVYLVDAVDKER       | 95.0% |
| AT4G27440 | 43,360.50 | LEAF cAMP   | 8-AEA-cAMP-agarose  | bead | 99.8%  | 2 | 2 | 7.73%  | KGNVVVTGASSGLGLATAK   | 95.0% |
|           |           |             |                     |      |        |   |   |        | LAQVVSDPSLTK          | 95.0% |
|           |           |             | cAMP antibody       | bead | 99.9%  | 2 | 2 | 7.98%  | GYVSETESGKR           | 95.0% |
|           |           |             |                     |      |        |   |   |        | RTETPLDVLVCNAAVYFPTAK | 95.0% |
|           |           | LEAF cGMP   | 2-AH-cGMP-agarose   | bead | 99.8%  | 2 | 2 | 4.74%  | ANLGLDK               | 95.0% |
|           |           |             |                     |      |        |   |   |        | LAQVVSDPSLTK          | 95.0% |
| AT3G01500 | 37,450.70 | LEAF cAMP   | 2-[Biotin]-AHA-cAMP | bead | 100.0% | 3 | 3 | 20.70% | AFDPVETIK             | 95.0% |
|           |           |             |                     |      |        |   |   |        | VCPSHVLDVDFQPGDAFVVR  | 95.0% |
|           |           |             |                     |      |        |   |   |        | VISELGDSAFEDQCGR      | 95.0% |
|           |           | LEAF cGMP   | 2-AH-cGMP-agarose   | bead | 99.8%  | 2 | 2 | 14.80% | AFDPVETIK             | 95.0% |
|           |           |             |                     |      |        |   |   |        | VISELGDSAFEDQCGR      | 95.0% |

Peptide sequences identified in each of the Arabidopsis CNBP candidates. The molecular weight (MW) is given in Dalton (Da). The fraction (Fract) in which the protein was identified is indicated with the number showing the millimolar concentration of the nucleotide in the elution series. Probability (Prob) of protein identification (ID) and peptide ID was calculated using Scaffold. The number (#) of unique (uniq) peptides and the # of total spectra is shown. Percentage (%) sequence (seq) coverage (cover) reveals the proportion of the protein identified.
